## **URBANISATION, BIRD SPECIES RICHNESS AND ABUNDANCE WITHIN IBADAN METROPOLIS, NIGERIA**

1. Festus O. Adegbola<sup>1</sup> (Corresponding Author)

Email address: [adegbolafestuso@gmail.com](mailto:adegbolafestuso@gmail.com)

2. Taiye Adeniyi Adeyanju<sup>1</sup>

Email address: [at.adeyanju@mail1.ui.edu.ng](mailto:at.adeyanju@mail1.ui.edu.ng)

3. Soladoye B. Iwajomo<sup>2</sup>

Email address: [siwajomo@unilag.edu.ng](mailto:siwajomo@unilag.edu.ng)

4. Ibukunoluwa Augustine Ayodele<sup>1</sup>

Email address: [profibikunayodele@yahoo.com](mailto:profibikunayodele@yahoo.com)

1 Department of Wildlife and Ecotourism Management, University of Ibadan, Ibadan, Nigeria

2 Department of Zoology, University of Lagos, Lagos, Nigeria

1  
2  
3  
4  
5  
6  
7  
8  
9  
10  
11  
12  
13  
14  
15  
16  
17  
18  
19  
20  
21  
22  
23  
24  
25

### ABSTRACT

Urbanisation is considered as one of the most profound threat to wildlife, with habitat loss and fragmentation being predominant. This study assessed the impacts of urbanisation on richness, abundance of bird species within Ibadan metropolis, Nigeria. A uniform grid of 500 square meters was installed on the map of Ibadan Metropolis using QGIS to produce 499 grid points distributed across the five urban local governments. 100 grids were selected randomly, identified with mapinR software application and surveyed with 5 point counts within each grid, established at 200m interval to avoid double counting. Each point count was observed for 5 minutes using a pair of 8x42mm binoculars within a 50m radius. Habitat variables like number of buildings, trees, paved roads, communication masts were also recorded.

A total number of 56 species of birds were observed at the end of the assessment, classified into 30 families. The test of statistics showed that there was no statistically significant difference in bird species richness between the Local Governments. The test of statistics showed that there was no statistically significant difference in bird species abundance between the local governments. The test of between-subjects effects revealed that there were no statistical significant effects when all the habitat variables were computed in the model on species richness. The number of paved roads and number of vehicles showed a significant effect on bird species abundance while others variables in the model did not exact statistically significant effects on bird species abundance.

The study therefore concluded that habitat actions due to urbanisation have not affected the richness and abundance of birds species found in all the local governments. The only habitat variables that have currently exacted significant effect on species abundance within the metropolis are number of vehicles and paved roads.

**Word Count:** 292

**Keywords:** Conservation, Species richness, Species abundance, Urbanisation

26

## INTRODUCTION

27 In wildlife conservation and management, there is need for a thorough understanding of the  
28 relationships among individual organisms and their environment, as it is important in the  
29 development of ecological theories and in the implementation of conservation strategies (Walker  
30 et al. 2008). It is general knowledge among environmentalists that there is an increase in the  
31 proportion of the earth's surface now converted to human-dominated urban areas; it therefore  
32 becomes expedient to understand how urban wildlife communities within these now  
33 sophisticated ecosystem types are structured (McKinney 2002). The importance of understanding  
34 the ecological effects of urbanisation cannot be under-emphasised, especially with its rapid  
35 conversion of previously wild lands around the world. The process associated with urbanisation  
36 has profound effects on the distribution of wildlife species and their habitats (Wolff et al. 2018).  
37 Urban development is characterised by rapid population growth and profound land use  
38 transformation, leading to land conversion, which is a predominant process affecting ecological  
39 community structure and population dynamics of living organisms (Hostetler 1997). Research  
40 studies show that urban landscapes supports biotic communities in which only a few species  
41 increase in density compared to natural areas, resulting in a distinct difference the community  
42 diversity between these two landscapes (McKinney 2002).

43 Developing countries have a large number of wildlife existing outside the protected areas, on  
44 farmlands, and in urban areas. Among all wildlife, bird species are largely one of the most  
45 common wildlife surviving in urban communities (Gatesire et al. 2015). Birds are one of the  
46 most easily studied taxa occurring in cities worldwide as they serve as indicators variables in  
47 ecological assessment and monitoring (Magle et al. 2012). Birds are also important in  
48 maintaining ecosystems. For example, insectivorous bird species regulate disease vectors  
49 including mosquito and rodents. Pied Crow (*Corvus albus*), contributes to biomass recycling and  
50 reduce levels of disposable waste as scavengers. Frugivorous birds play a crucial role in the  
51 dispersal of seeds of fruit trees. Sun birds also helps to pollinate plants (Gatesire et al. 2015).

52 Studies show that bird species in different regions respond to urbanisation in a similar way with  
53 most research suggesting that bird communities are negatively impacted by urbanisation (Lin et  
54 al. 2011; Sol et al. 2014). There is a general shrinkage in species distribution as urbanisation  
55 increases, and the fact that similar bird species can be found in various urban landscape indicates

56 that urbanisation has a similar effect on local communities of birds irrespective of the region (Lin  
57 et al. 2011). As a result of the crucial role birds play in maintaining ecosystems and also support  
58 biodiversity, conservationists seek their protection against biological threats and protect the  
59 environment efficiently (Gatesire et al. 2015).

60 Primarily the development level, habitat diversity, age and diversity of vegetation present  
61 determine the richness of birds in urban areas (McKinney 2002). Native bird species that persists  
62 in urban landscapes partly depends on the actions of the landowners because the structural and  
63 vegetative characteristics of urban landscapes are largely human-influenced (McCaffrey and  
64 Mannan 2012). Urban areas have less assembly of bird species than adjacent natural areas,  
65 though some type and level of development support more native bird species than others.  
66 According to McKinney (2002), the moderate level of development and vegetation linkable to  
67 low density residential areas can support higher densities of some native birds species than other  
68 types of urban land use, also including undisturbed sites.

69

## MATERIALS AND METHODS

### 70 STUDY AREA

71 The study was conducted in Ibadan metropolis, the capital of Oyo State. Ibadan metropolis,  
72 covering an area of 129.65 km<sup>2</sup>, is located in South-Western Nigeria in the southeastern part  
73 of Oyo State at about 119 kilometers (74 miles) northeast of Lagos and 120 kilometers (75 miles)  
74 east of the Nigerian international border with the Republic of Benin (Popoola and Wahab 2018).  
75 Ibadan falls totally within the forest zone but close to the boundary between the forest and the  
76 derived savanna. It lies between latitude 3°3' N and 4°10' N and longitude 7°2'E and 7°40' E.  
77 (Popoola and Wahab 2018). The population of Metropolitan Ibadan is 1 338 659 according to  
78 census results for 2006 (Areola and Ikporukpo 2018). There are eleven (11) local governments in  
79 Ibadan Metropolitan area consisting of five urban local governments and six semi-urban local  
80 governments. The former are: Ibadan South East, Ibadan North East, Ibadan North West, Ibadan  
81 South West and Ibadan North Local Government Areas. Ibadan North Local Government has the  
82 largest land area among the urban Local Governments, while Ibadan North West is the smallest  
83 (Fig. 2). The second largest local government in Urban Ibadan is Ibadan South West. Ibadan  
84 metropolis is an important commercial centre and it comprises of people of different cultural and  
85 socio-economic backgrounds. General land use pattern of the Ibadan metropolitan area shows a  
86 clear distinction purely residential use for Urban Ibadan and agricultural use for semi-urban  
87 Ibadan (Salami et al. 2016).

88

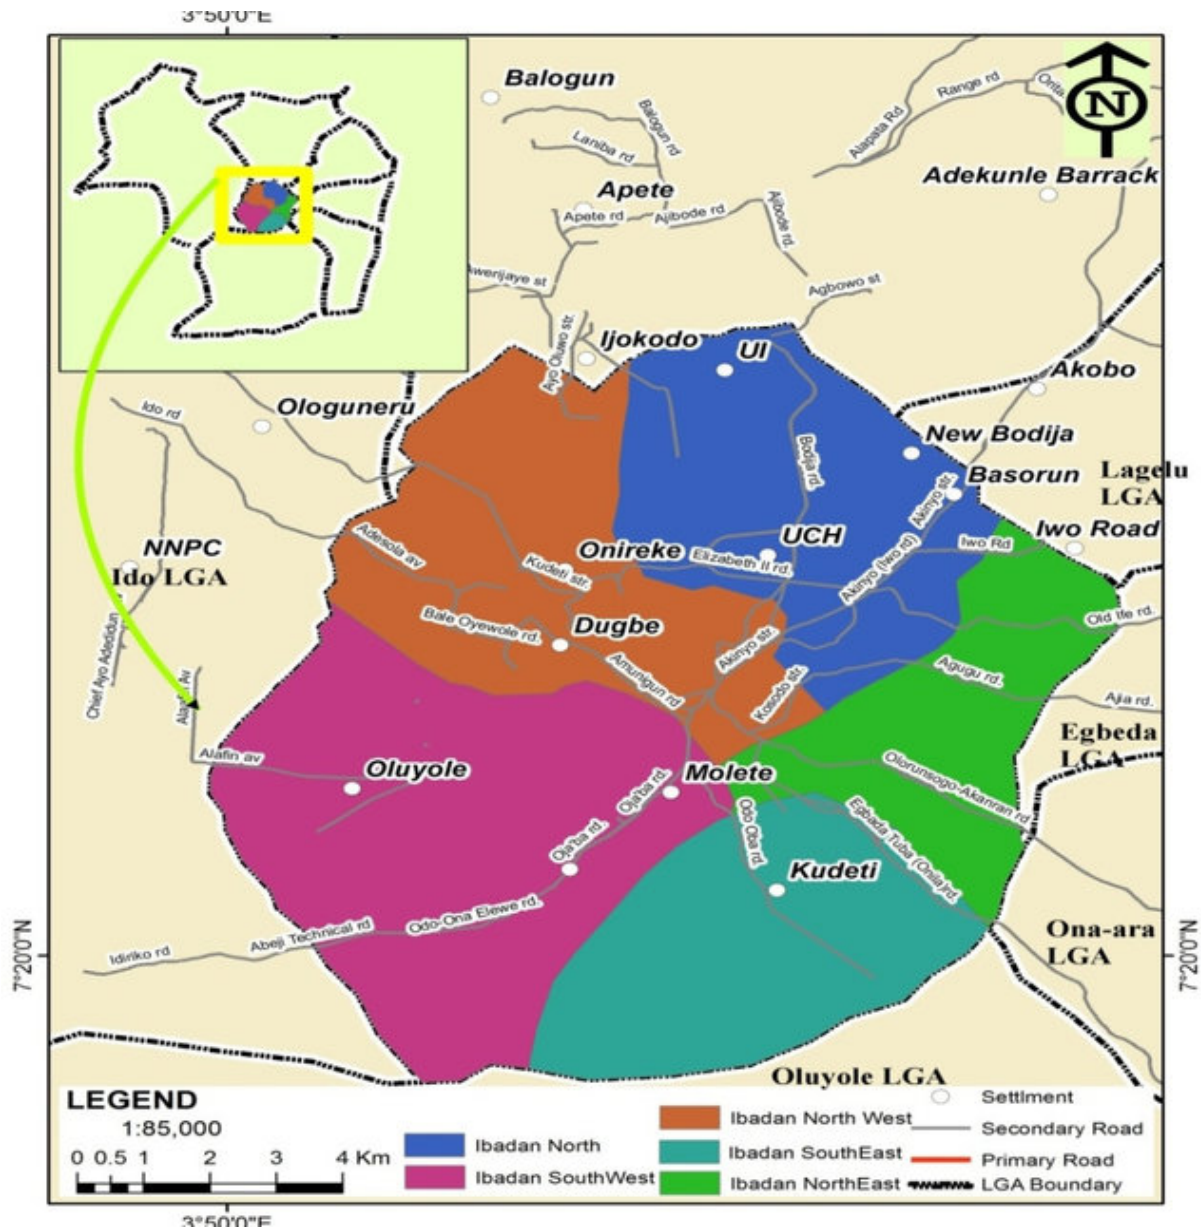

89

90 Figure 1: Map of Ibadan Metropolis

91 Source: (Popoola and Wahab 2018)

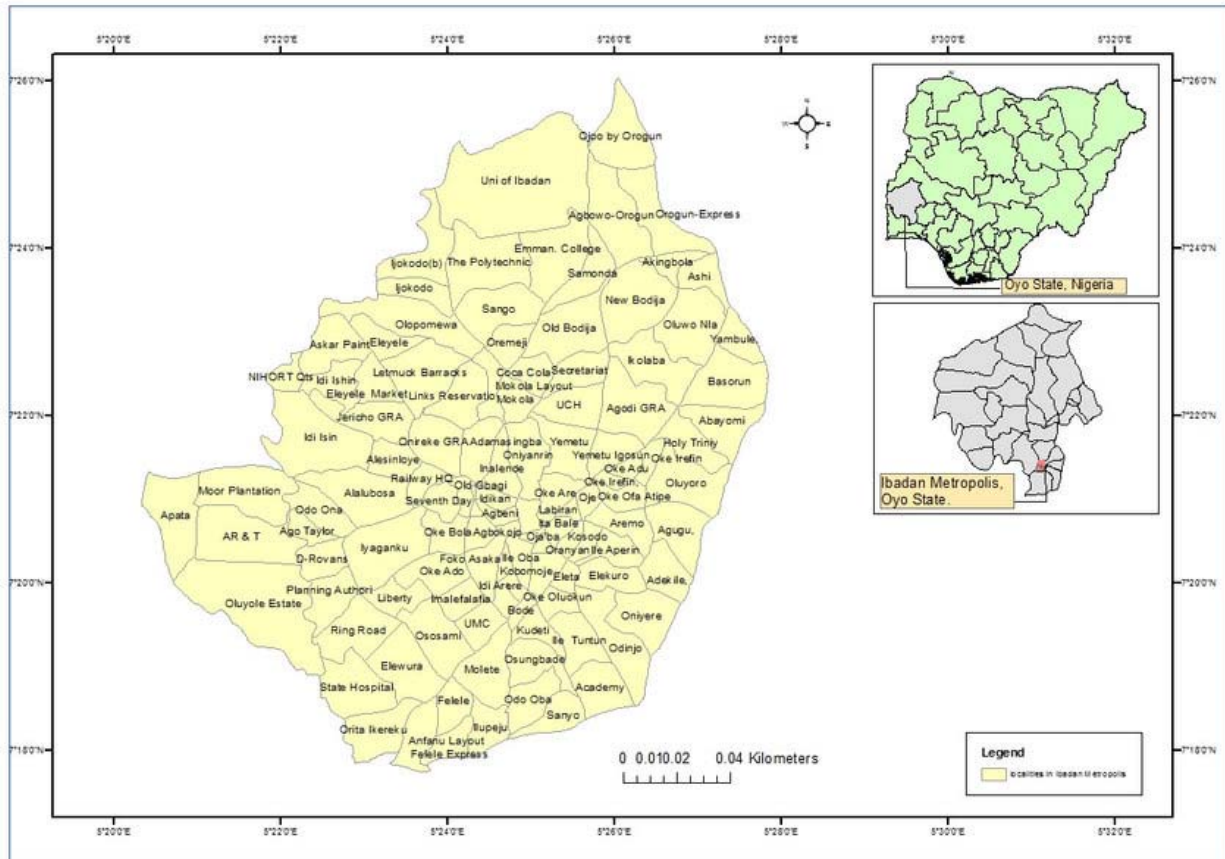

92

93 Figure 2: Map of Ibadan Metropolis, Oyo State showing communities

94 Source: (Areola and Ikporukpo 2018)

95 **BIRD ASSESSMENT**

96 Using QGIS software application, a uniform grid of 500 by 500 metres was installed on the map  
97 of Ibadan Metropolis to produce 499 grids distributed across all the five urban local  
98 governments. 100 grids were surveyed with 5 point counts within each grid, established at 200  
99 m interval to avoid double counting, each point count was observed for 5 minutes within a 50 m  
100 radius. Laser range finder was used to delineate the 50 m radius around each survey point, and to  
101 estimate distances to birds. Birds encountered outside the study grids were recorded only when it  
102 has never been observed in any of the grids before. When a bird could not be identified in the  
103 field, photos from a high resolution camera were taken for later identification by an expert in  
104 ornithology. During each visit, a pair of 8x42 mm binoculars was used for sighting birds. Helms  
105 field guide to the birds of western Africa (Borrow and Demey 2013) was used to identify the  
106 birds; birds call were recorded with a voice recorder and later played back for confirmation. The  
107 data were collected between October to December 2020, and observations were done in the  
108 morning and evening. Habitat variables recorded for this study, the number of buildings, number  
109 of trees, number of communication masts, ground cover, canopy cover, number of pedestrians  
110 and vehicles passing within 25 m radius around the point, describe urban form. No specific  
111 permissions were required to conduct this work. All bird surveys were conducted in areas which  
112 are open to the public; therefore there was no need to ask land managers for approval



113

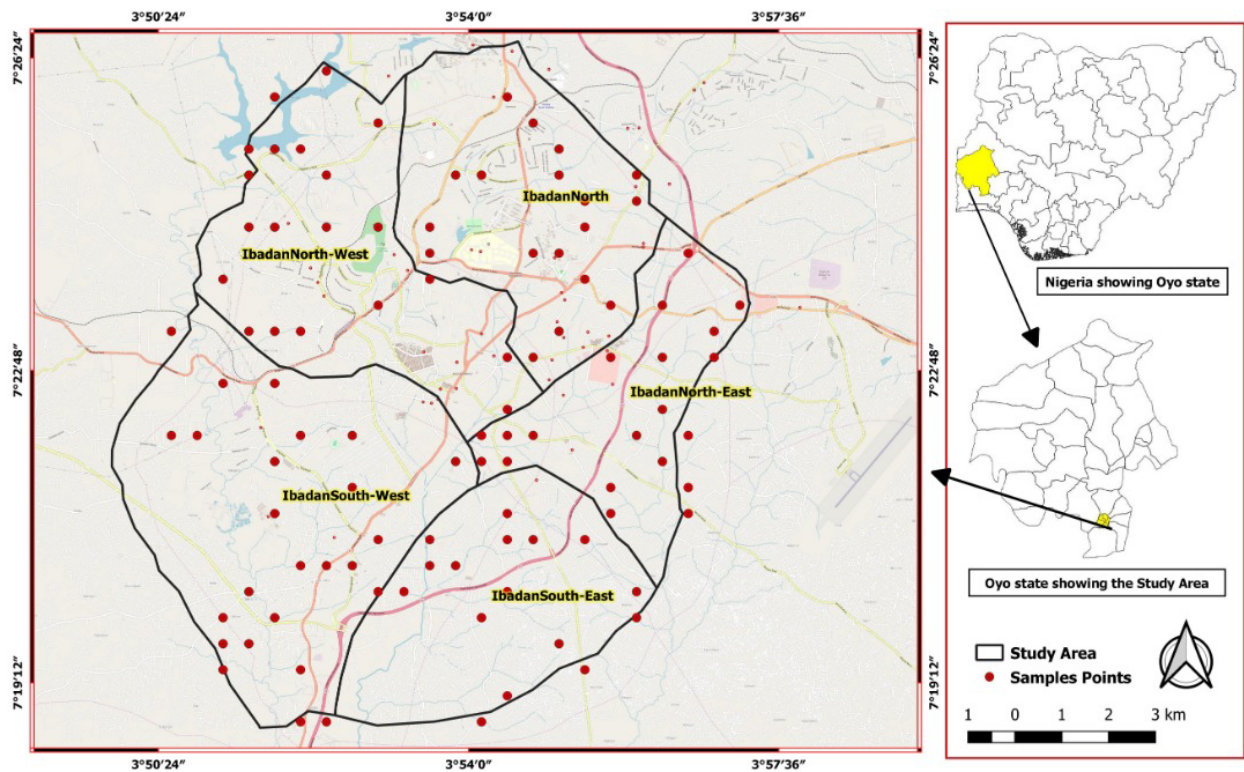

114

115 • Figure 3: Map showing survey grids

116 • Source: QGIS Application

117

## 118    **DATA ANALYSIS**

119    Species richness and abundance was obtained by counting the total number of species and  
120    individual per species respectively as recorded within each grid. The data collected were entered  
121    and summarised in Microsoft Excel spread sheet computer software for analysis. Tables and  
122    figures were used to represent the results.

123    General Linear models method was fitted in R statistical package version 3.4.2 using test of  
124    correlation to the determine relationship between the vegetation variables, bird species richness,  
125    and bird abundance at 0.05 level of significance.

126

## RESULTS

127 This chapter present the results of the data obtained for the purpose of this study. QGIS software  
128 application, using a uniform grid of 500 by 500 metres installed across all five selected urban  
129 local government in Ibadan was used in collecting the data. General Linear Model (GLM) of  
130 statistical analysis was used in analyzing the collected data and testing for statistical significant  
131 difference in bird species richness, bird abundance and the habitat variables that determines/  
132 influence bird species richness and its abundance within the metropolis. ( $\alpha = 0.05$ ).

133 The study observed 56 different species of birds which was grouped into 30 families. (See  
134 appendix)

### 135 DETERMINATION OF SPECIES RICHNESS WITHIN THE METROPOLIS

136 Descriptive statistics, Kruskal- Wallis H Test and Post Hoc Test were carried out to determine  
137 whether there are statistically significant differences between bird species richness and the five  
138 selected urban local government. The local government being the independent variable and bird  
139 species observed being the dependent variable.

140 The results showed that mean bird species richness at Ibadan North East, North West, South East  
141 and South West were estimated at  $8.20 \pm 1.643$ ,  $10.84 \pm 2.630$ ,  $8.27 \pm 2.724$ ,  $9.36 \pm 2.629$  and  
142  $10.54 \pm 5.222$  respectively.

143 On the overall, Bird species richness for Ibadan metropolis was estimated at  $9.73 \pm 3.301$ . (See  
144 table 1a)

145 The Kuskal- Wallis H Test revealed that the mean rank for Ibadan North East is **24.70**, Ibadan  
146 North is **44.74**, Ibadan North West is **25.32**, Ibadan South East is **34.55** and Ibadan South West is  
147 **36.38** (See table 1b). It implies that mean of Ibadan North will be rank first in bird species  
148 richness, followed by Ibadan South West, Ibadan South East, Ibadan North West and Ibadan  
149 North East respectively.

150 The test statistics table showed a chi-square value ( $X^2$ ) of **8.253** and a p-value of **0.083**. At 5%  
151 C.I., the calculated p-value (0.083) is greater than 0.05. This implies that bird species richness  
152 between the different local governments is ns.

153 **Table 1a: Descriptive Statistics on Species Richness**

154

155 **Descriptive Statistics**

156

157 Dependent Variable: Species richness

| <b>Local Government</b> | <b>N</b> | <b>Mean</b> | <b>Std. Deviation</b> |
|-------------------------|----------|-------------|-----------------------|
| Ibadan North East       | 5        | 8.20        | 1.643                 |
| Ibadan North            | 19       | 10.84       | 2.630                 |
| Ibadan North West       | 11       | 8.27        | 2.724                 |
| Ibadan South East       | 22       | 9.36        | 2.629                 |
| Ibadan South West       | 13       | 10.54       | 5.222                 |
| Total                   | 70       | 9.73        | 3.301                 |

158

159

160 **Table 1b: Kruskal- Wallis H Test on species richness**

161 **Kruskal-Wallis Test Rank**

| <b>Local Government</b> | <b>N</b> | <b>Mean Rank</b> |
|-------------------------|----------|------------------|
| Ibadan North East       | 5        | 24.70            |
| Ibadan North            | 19       | 44.74            |
| Ibadan North West       | 11       | 25.32            |
| Ibadan South East       | 22       | 34.55            |
| Ibadan South West       | 13       | 36.38            |
| Total                   | 70       |                  |

162

Test Statistics

Species richness

|             |       |
|-------------|-------|
| Chi-Square  | 8.253 |
| Df          | 4     |
| Asymp. Sig. | .083  |

a. Kruskal Wallis Test

b. grouping variable: local government

163

164

165 **Table 1c: Post Hoc Test on Bird Species Richness**

166

**Multiple Comparisons**

Dependent Variable: Species richness

Tukey HSD

|                                       |                   | Mean<br>Difference<br>(I-J) | Std.<br>Error | Sig.  | 95% Confidence<br>Interval |                |      |
|---------------------------------------|-------------------|-----------------------------|---------------|-------|----------------------------|----------------|------|
|                                       |                   |                             |               |       | Lower<br>Bound             | Upper<br>Bound |      |
| (I) Local government                  | Ibadan North East | Ibadan North                | -2.64         | 1.628 | .488                       | -7.21          | 1.93 |
|                                       |                   | Ibadan North<br>West        | -.07          | 1.747 | 1.000                      | -4.97          | 4.83 |
|                                       |                   | Ibadan South East           | -1.16         | 1.605 | .950                       | -5.67          | 3.34 |
|                                       |                   | Ibadan South<br>West        | -2.34         | 1.704 | .647                       | -7.12          | 2.44 |
| Ibadan North Local<br>Government      | Ibadan North East | Ibadan North East           | 2.64          | 1.628 | .488                       | -1.93          | 7.21 |
|                                       |                   | Ibadan North<br>West        | 2.57          | 1.227 | .235                       | -.87           | 6.01 |
|                                       |                   | Ibadan South East           | 1.48          | 1.014 | .593                       | -1.37          | 4.32 |
|                                       |                   | Ibadan South<br>West        | .30           | 1.166 | .999                       | -2.97          | 3.57 |
| Ibadan North West<br>Local government | Ibadan North East | Ibadan North East           | .07           | 1.747 | 1.000                      | -4.83          | 4.97 |
|                                       |                   | Ibadan North                | -2.57         | 1.227 | .235                       | -6.01          | .87  |
|                                       |                   | Ibadan South East           | -1.09         | 1.196 | .891                       | -4.45          | 2.26 |
|                                       |                   | Ibadan South<br>West        | -2.27         | 1.327 | .437                       | -5.99          | 1.46 |
| Ibadan South East                     | Ibadan North East | 1.16                        | 1.605         | .950  | -3.34                      | 5.67           |      |

|                   |                      |       |       |      |       |      |
|-------------------|----------------------|-------|-------|------|-------|------|
| Local Government  | Ibadan North         | -1.48 | 1.014 | .593 | -4.32 | 1.37 |
|                   | Ibadan North<br>West | 1.09  | 1.196 | .891 | -2.26 | 4.45 |
|                   | Ibadan South<br>West | -1.17 | 1.133 | .837 | -4.35 | 2.00 |
| Ibadan South West | Ibadan North East    | 2.34  | 1.704 | .647 | -2.44 | 7.12 |
| Local Government  | Ibadan North         | -.30  | 1.166 | .999 | -3.57 | 2.97 |
|                   | Ibadan North<br>West | 2.27  | 1.327 | .437 | -1.46 | 5.99 |
|                   | Ibadan South East    | 1.17  | 1.133 | .837 | -2.00 | 4.35 |

---

Based on observed means.

The error term is Mean Square (Error) = 10.490.

167

168

169                    **DETERMINATION OF SPECIES ABUNDANCE WITHIN THE METROPOLIS**

170    The results in table 4.2a showed that *the mean bird abundance and standard deviation* was  
171    estimated at  $64.40 \pm 12.28$  for Ibadan North East,  $68.42 \pm 31.39$  for Ibadan North,  $46.36 \pm 9.63$   
172    for Ibadan North West,  $53.68 \pm 24.16$  for Ibadan South East and  $65.69 \pm 51.26$  Ibadan South  
173    West. Overall mean bird abundance and standard deviation is estimated at  $59.52 \pm 31.35$ .

174    The Kruskal-Wallis Test showed that in term of ranking the abundance of bird species, Ibadan  
175    North East will be rank first, followed by Ibadan North, Ibadan North west, Ibadan South east  
176    and Ibadan South West respectively. (See table 2b)

177    The test statistics table showed a chi-square value ( $X^2$ ) of **6.973** and a p-value of **0.137**. At 5%  
178    S.L., the calculated p-value is .137; which is greater than 0.05. This implies that bird species  
179    abundance between the different local governments is ns.

180    The multiple comparisons table showed that were no statistically significant differences in bird  
181    species abundance between any of the selected local government, as p-value in all the  
182    comparison are greater than 5%. (See table 2c)



183 **Table 2a: Descriptive Statistics on species abundance**

184

185 **Descriptive Statistics**

186

187 Dependent Variable: Species abundance

| <b>Local Government</b> | <b>N</b> | <b>Mean</b> | <b>Std. Deviation</b> |
|-------------------------|----------|-------------|-----------------------|
| Ibadan North East       | 5        | 64.4000     | 12.28007              |
| Ibadan North            | 19       | 68.4211     | 31.39058              |
| Ibadan North West       | 11       | 46.3636     | 9.63611               |
| Ibadan South East       | 22       | 53.6818     | 24.16291              |
| Ibadan South West       | 13       | 65.6923     | 51.26465              |
| Total                   | 70       | 59.5286     | 31.35571              |

188

189 **Table 2b: Kruskal- Wallis H Test on Bird Species Abundance**

190 **Kruskal-Wallis Test Rank**

| <b>Local Government</b> | <b>N</b> | <b>Mean Rank</b> |
|-------------------------|----------|------------------|
| Ibadan North East       | 5        | 47.00            |
| Ibadan North            | 19       | 42.79            |
| Ibadan North West       | 11       | 26.27            |
| Ibadan South East       | 22       | 32.18            |
| Ibadan South West       | 13       | 33.85            |
| Total                   | 70       |                  |

191

192

**Test Statistics**

| <b>Species abundance</b> |       |
|--------------------------|-------|
| Chi-Square               | 6.973 |
| Df                       | 4     |
| Asymp. Sig.              | .137  |

a. Kruskal Wallis Test

b. grouping variable: local government

193

194

**Table 2c**

**Post Hoc Test on Bird Species Abundance**

**Multiple Comparisons**

| Dependent Variable:                |                   | Species Abundance |              |       |                         |         |
|------------------------------------|-------------------|-------------------|--------------|-------|-------------------------|---------|
| Tukey HSD                          |                   |                   |              |       |                         |         |
|                                    |                   | Mean              |              |       | 95% Confidence Interval |         |
|                                    |                   | Difference (I-    | Std.         |       | Lower                   | Upper   |
| (I) Local government               |                   | J)                | Error        | Sig.  | Bound                   | Bound   |
| Ibadan North East                  | Ibadan North      | -4.0211           | 15.6561<br>3 | .999  | -47.9494                | 39.9073 |
|                                    | Ibadan North West | 18.0364           | 16.8003<br>9 | .819  | -29.1026                | 65.1753 |
|                                    | Ibadan South East | 10.7182           | 15.4321<br>4 | .957  | -32.5817                | 54.0181 |
|                                    | Ibadan South West | -1.2923           | 16.3915<br>6 | 1.000 | -47.2841                | 44.6995 |
| Ibadan North Local Government      | Ibadan North East | 4.0211            | 15.6561<br>3 | .999  | -39.9073                | 47.9494 |
|                                    | Ibadan North West | 22.0574           | 11.8012<br>5 | .344  | -11.0548                | 55.1697 |
|                                    | Ibadan South East | 14.7392           | 9.75539      | .559  | -12.6327                | 42.1111 |
|                                    | Ibadan South West | 2.7287            | 11.2115<br>9 | .999  | -28.7290                | 34.1865 |
| Ibadan North West Local government | Ibadan North East | -18.0364          | 16.8003<br>9 | .819  | -65.1753                | 29.1026 |
|                                    | Ibadan North      | -22.0574          | 11.8012<br>5 | .344  | -55.1697                | 11.0548 |
|                                    | Ibadan South East | -7.3182           | 11.5024      | .969  | -39.5920                | 24.9556 |

|                   |                   |          |         |       |          |         |
|-------------------|-------------------|----------|---------|-------|----------|---------|
|                   |                   |          | 4       |       |          |         |
|                   | Ibadan South West | -19.3287 | 12.7608 | .557  | -55.1333 | 16.4759 |
|                   |                   |          | 1       |       |          |         |
| Ibadan South East | Ibadan North East | -10.7182 | 15.4321 | .957  | -54.0181 | 32.5817 |
| Local Government  |                   |          | 4       |       |          |         |
|                   | Ibadan North      | -14.7392 | 9.75539 | .559  | -42.1111 | 12.6327 |
|                   | Ibadan North West | 7.3182   | 11.5024 | .969  | -24.9556 | 39.5920 |
|                   |                   |          | 4       |       |          |         |
|                   | Ibadan South West | -12.0105 | 10.8966 | .805  | -42.5845 | 18.5635 |
|                   |                   |          | 2       |       |          |         |
| Ibadan South West | Ibadan North East | 1.2923   | 16.3915 | 1.000 | -44.6995 | 47.2841 |
| Local Government  |                   |          | 6       |       |          |         |
|                   | Ibadan North      | -2.7287  | 11.2115 | .999  | -34.1865 | 28.7290 |
|                   |                   |          | 9       |       |          |         |
|                   | Ibadan North West | 19.3287  | 12.7608 | .557  | -16.4759 | 55.1333 |
|                   |                   |          | 1       |       |          |         |
|                   | Ibadan South East | 12.0105  | 10.8966 | .805  | -18.5635 | 42.5845 |
|                   |                   |          | 2       |       |          |         |

---

Based on observed means.

The error term is Mean Square (Error) = 970.245.

196 **DETERMINATION OF HABITAT PARAMETERS THAT INFLUENCE BIRD SPECIES**  
197 **RICHNESS WITHIN IBADAN METROPOLIS**

198 The test of between-subjects effects in table 3 showed whether the habitat variables (independent  
199 variables) are statistically significant in assessing and influencing bird species richness within  
200 Ibadan Metropolis.

201 The results revealed that there was **no** statistically significant relationship between the effect of  
202 the number of **buildings** on bird species richness, **F (1, 54) = 0.075, p = 0.786**; there was **no**  
203 statistically significant relationship between the effects of the number of **trees** on bird species  
204 richness, **F (1, 54) = 0.450, p = 0.505**; there was **no** statistically significant relationship between  
205 the effects of the number of **masts** on bird species richness, **F (1, 54) = 0.323, p = 0.572**; there  
206 was **no** statistically significant relationship between the effects of the number of **paved roads** on  
207 bird species richness, **F (1, 54) = 0.808, p = 0.373**; there was **no** statistically significant  
208 relationship between the effects of the number **lawns** on bird species richness, **F (1, 54) = 0.090,**  
209 **p = 0.766**; there was **no** statistically significant relationship between the effects of the percentage  
210 of **canopy covers** on bird species richness, **F (1, 54) = 0.360, p = 0.881**; there was **no**  
211 statistically significant relationship between the effects of the percentage of **ground covers** on  
212 bird species richness, **F (1, 54) = 0.043 p = 0.836**; there was **no** statistically significant  
213 relationship between the effects of the presence of **farm land** on bird species richness, **F (1, 54)**  
214 **= 0.30, p = 0.863**; there was **no** statistically significant relationship between the effects of the  
215 number of **vehicles** on bird species richness, **F (1, 54) = 7.437, p = 0.09**; there was **no**  
216 statistically significant relationship between the effects of the number of **pedestrians** on bird  
217 species richness, **F (1, 54) = 2.744, p = 0.103**; there was **no** statistically significant relationship  
218 between the effects of the number of **nests** on bird species richness, **F (1, 54) = 0.517, p = 0.475.**

219 Also, **R square of 32.9%** implies that all the independent variables are not too strong in  
220 predicting or influencing model.

221 We can therefore conclude that there were no statistically significant interaction between all the  
222 habitat parameters/variables and bird species richness within Ibadan Metropolis. That is all the  
223 habitat parameters/ variables did not influence bird species richness within Ibadan.

224 **Table 3: Test of between- Subjects Effects on Species Richness and habitat variables**

225 **Test of Between- Subjects Effects**

| Source                     | Type III Sum of Squares | df | Mean Square | F      | Sig. (p-value) |
|----------------------------|-------------------------|----|-------------|--------|----------------|
| Corrected Model            | 247.093 <sup>a</sup>    | 15 | 16.473      | 1.762  | .066           |
| Intercept                  | 317.361                 | 1  | 317.361     | 33.952 | .000           |
| Number of Buildings        | .698                    | 1  | .698        | .075   | .786           |
| Number of Trees            | 4.202                   | 1  | 4.202       | .450   | .505           |
| Number of Masts            | 3.020                   | 1  | 3.020       | .323   | .572           |
| Number of Paved            | 7.556                   | 1  | 7.556       | .808   | .373           |
| Number of Lawns            | .838                    | 1  | .838        | .090   | .766           |
| Percentage of Canopy cover | 3.362                   | 1  | 3.362       | .360   | .551           |
| Percentage of Ground cover | .405                    | 1  | .405        | .043   | .836           |
| Presence of farmland       | .280                    | 1  | .280        | .030   | .863           |
| Number of vehicles         | 69.511                  | 1  | 69.511      | 7.437  | .009           |
| Number of Pedestrians      | 25.651                  | 1  | 25.651      | 2.744  | .103           |
| Number of nests            | 4.831                   | 1  | 4.831       | .517   | .475           |
| Error                      | 504.750                 | 54 | 9.347       |        |                |
| Total                      | 7377.000                | 70 |             |        |                |
| Corrected Total            | 751.843                 | 69 |             |        |                |

226 R Squared = .329 (Adjusted R Squared = .142)

227 **DETERMINATION OF HABITAT PARAMETERS THAT INFLUENCE BIRD SPECIES**  
228 **ABUNDANCE WITHIN IBADAN METROPOLIS**

229 The results revealed that there was **no** statistically significant interaction between the effect of  
230 the number of **buildings** on bird species richness, **F (1, 54) = 0.20, p = 0.888**; there was **no**  
231 statistically significant interaction between the effects of the number of **trees** on bird species  
232 richness, **F (1, 54) = 2.181, p = 0.145**; there was **no** statistically significant interaction between  
233 the effects of the number of **masts** on bird species richness, **F (1, 54) = 0.359, p = 0.552**; there  
234 was statistically significant interaction between the effects of the number of **paved roads** on bird  
235 species richness, **F (1, 54) = 5.632, p = 0.021**; there was **no** statistically significant interaction  
236 between the effects of the number of **lawns** on bird species richness, **F (1, 54) = 1.408, p =**  
237 **0.241**; there was **no** statistically significant interaction between the effects of the percentage of  
238 **canopy covers** on bird species richness, **F (1, 54) = 1.412 p = 0.240**; there was **no** statistically  
239 significant interaction between the effects of the percentage of **ground cover** on bird species  
240 richness, **F (1, 54) = 0.01, p = 0.981**; there was **no** statistically significant interaction between  
241 the effects of the presence of **farm land** on bird species richness, **F (1, 54) = 0.100, p = 0.754**;  
242 there was statistically significant interaction between the effects of the number of **vehicles** on  
243 bird species richness, **F (1, 54) = 5.042, p = 0.022**; there was **no** statistically significant  
244 interaction between the effects of the number of **pedestrians** on bird species richness, **F (1, 54) =**  
245 **0.302, p = 0.585**; there was **no** statistically significant interaction between the effects of the  
246 number of **nests** on bird species richness, **F (1, 54) = 0.419, p = 0.520**. The results revealed that  
247 there were statistically significant interaction between the number of paved and the number of  
248 vehicles on the bird species abundance and no statistically significant interaction in all other  
249 habitat variables/parameters. (See table 4)

250 Also, R square of 26.2% implies that the independent variables are weak in predicting or  
251 influencing bird species abundance.

252 We can therefore conclude that only number of paved roads and number of vehicles exact a  
253 significant effect on bird species abundance while all other habitat variables do not exact  
254 significant influence on bird species abundance within Ibadan Metropolis. That is, all other  
255 habitat parameters/ variables did not influence bird species abundance, except numbers of paved  
256 roads and vehicles available within Ibadan metropolis.

257 **Table 4: Test of between- Subjects Effects on Species Abundance and Habitat**  
 258 **Variables**

259 **Test of Between- Subjects Effects**

| <b>Source</b>          | <b>Type III Sum of Squares</b> | <b>df</b> | <b>Mean Square</b> | <b>F</b> | <b>Sig. ( p - value)</b> |
|------------------------|--------------------------------|-----------|--------------------|----------|--------------------------|
| Corrected Model        | 17805.715                      | 15        | 1187.048           | 1.281    | .246                     |
| Intercept              | 5930.968                       | 1         | 5930.968           | 6.401    | .014                     |
| Number of Buildings    | 18.417                         | 1         | 18.417             | .020     | .888                     |
| Number of Trees        | 2027.731                       | 1         | 2027.731           | 2.188    | .145                     |
| Number of Masks        | 332.432                        | 1         | 332.432            | .359     | .552                     |
| Number of Paved        | 5218.020                       | 1         | 5218.020           | 5.632    | .021                     |
| Number of Lawns        | 1304.756                       | 1         | 1304.756           | 1.408    | .241                     |
| Number of Canopy cover | 1308.209                       | 1         | 1308.209           | 1.412    | .240                     |
| Number of Ground cover | .531                           | 1         | .531               | .001     | .981                     |
| Presence of farmland   | 92.273                         | 1         | 92.273             | .100     | .754                     |
| Number of vehicles     | 5135.375                       | 1         | 5135.375           | 5.542    | .022                     |
| Number of Pedestrians  | 279.845                        | 1         | 279.845            | .302     | .585                     |
| Number of nests        | 388.402                        | 1         | 388.402            | .419     | .520                     |
| Error                  | 50033.728                      | 54        | 926.551            |          |                          |
| Total                  | 315895.000                     | 70        |                    |          |                          |
| Corrected Total        | 67839.443                      | 69        |                    |          |                          |

260 R Squared = .262 (Adjusted R Squared = .058)

261



262 **4.5 PICTURES OF BIRDS SPECIES AND ACTIVITY SIGHTED IN URBAN AREAS**

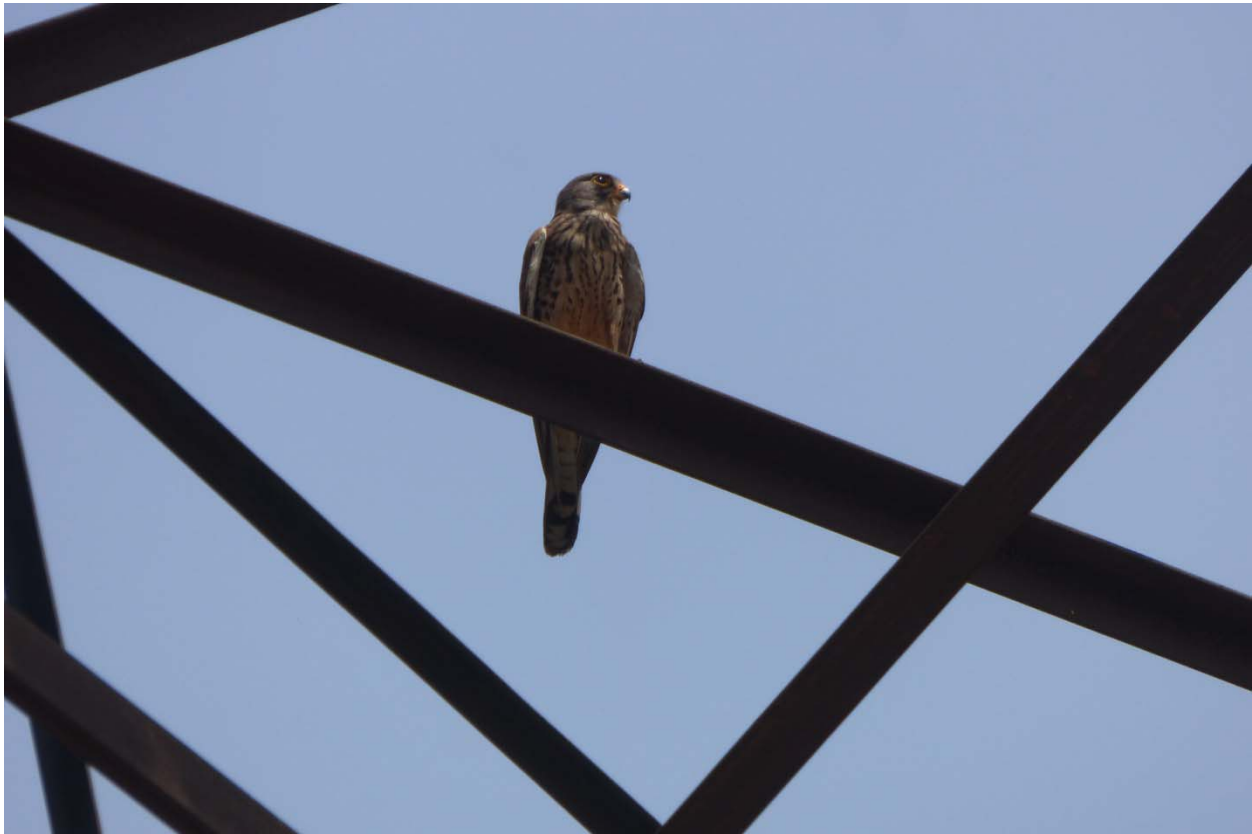

263

264 **Figure 4: Common Kestrel (*Falco tinnunculus*) resting on a billboard**

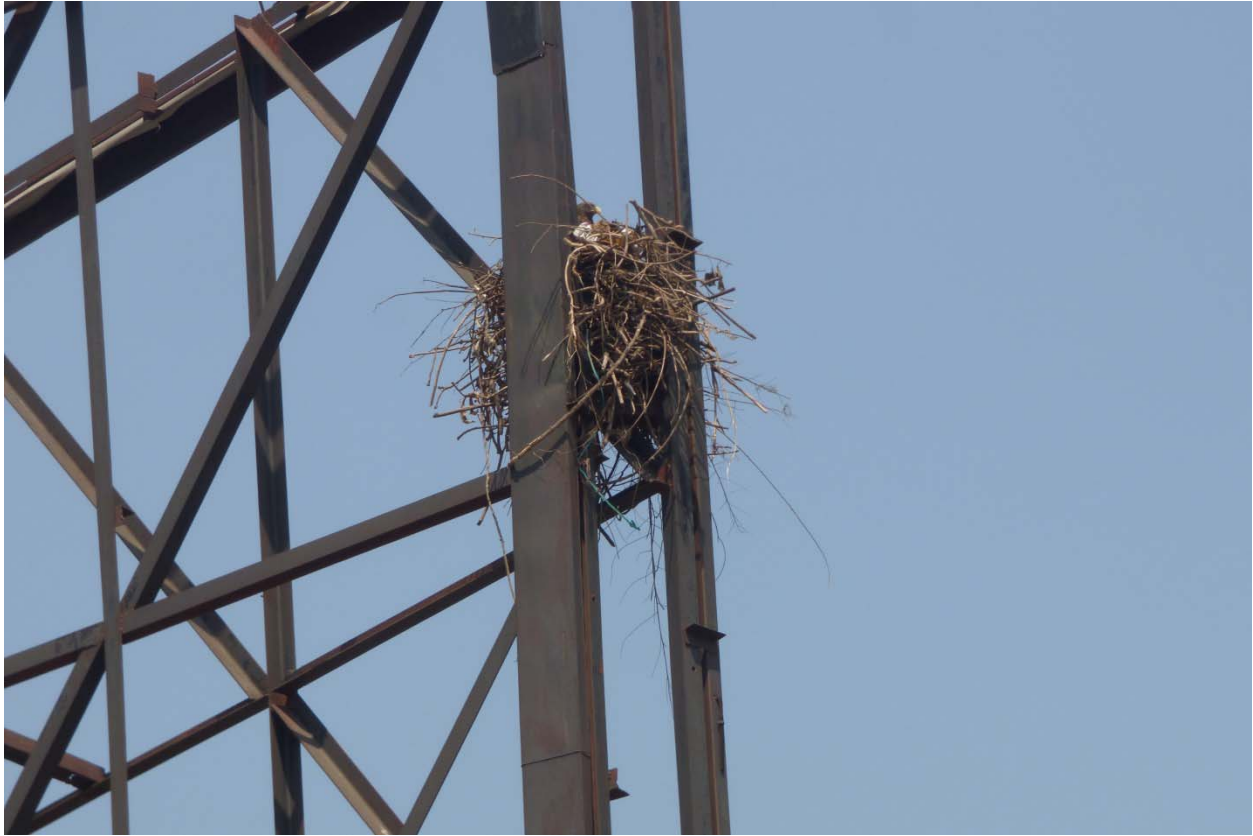

265

266 Figure 5: Yellow Billed Kite (*Milvus aegyptius*) brooding in a nest hung on a billboard

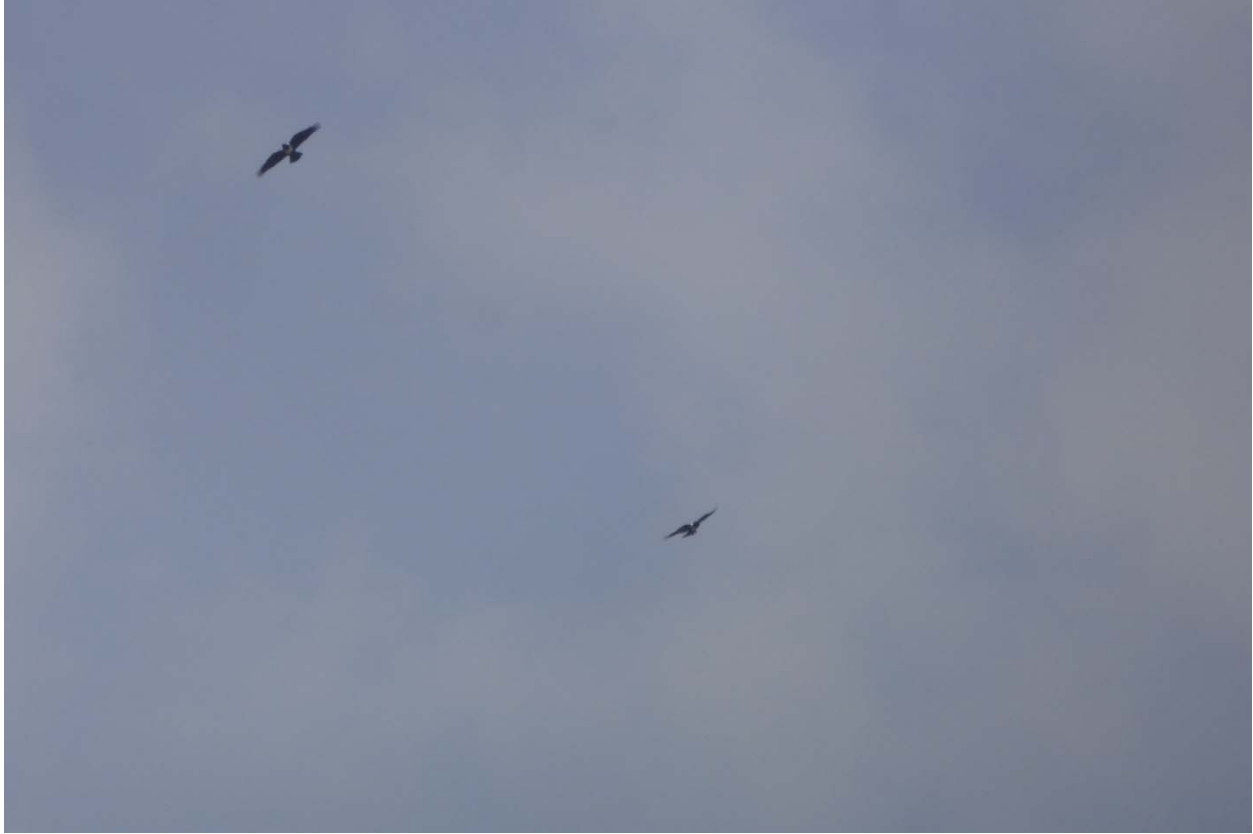

267

268 Figure 6: Pied Crow (*Corvus albus*) hovering in the sky

269

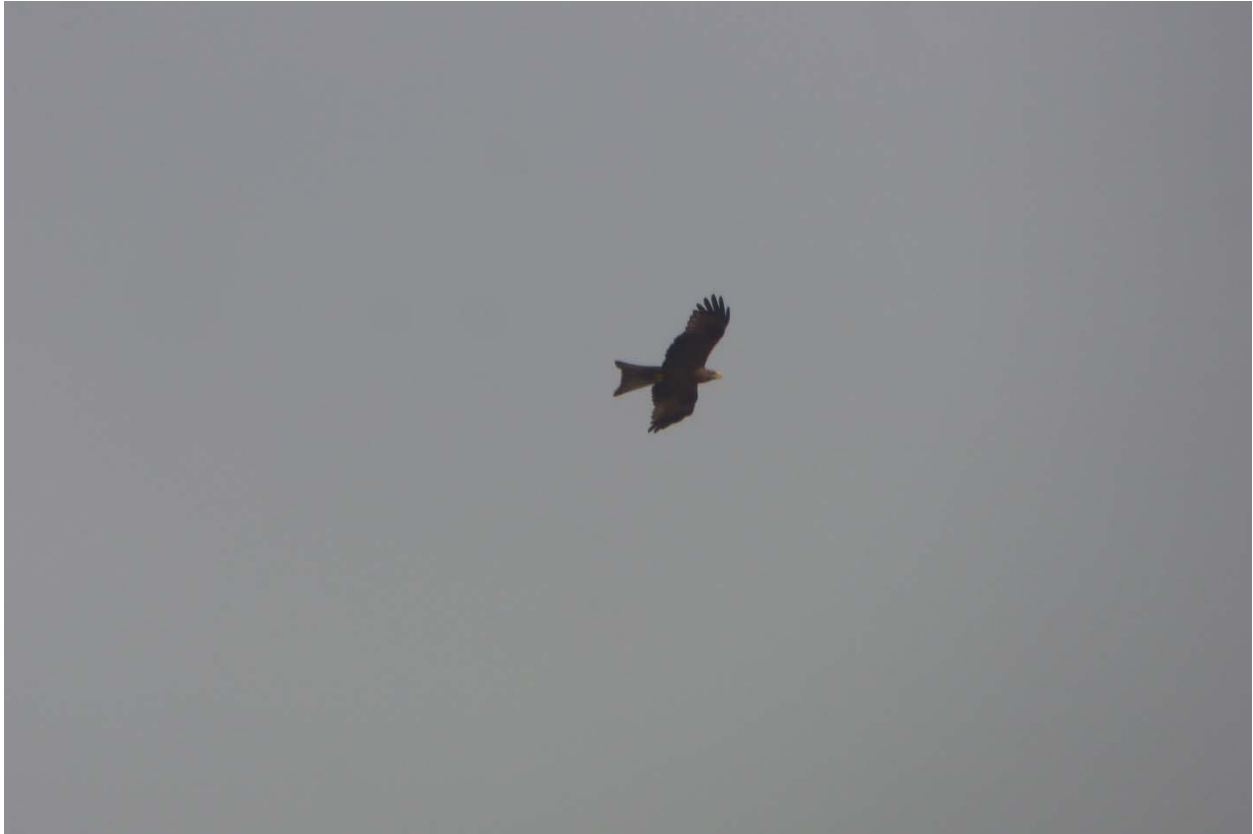

270

271 Figure 7: Yellow Billed Kite (*Milvus aegyptius*) hovering in the sky

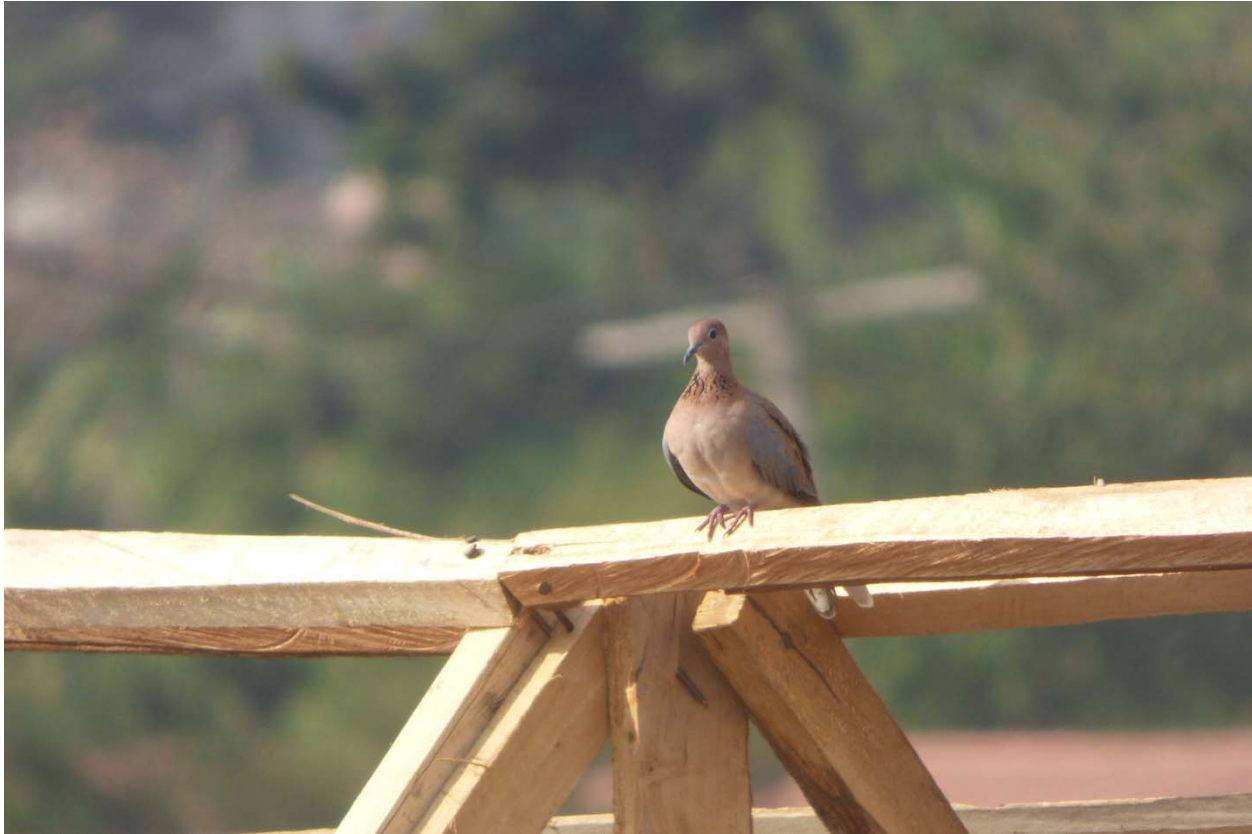

272

273 Figure 8: Laughing Dove (*Streptopelia semitorquata*) resting on a roof

274

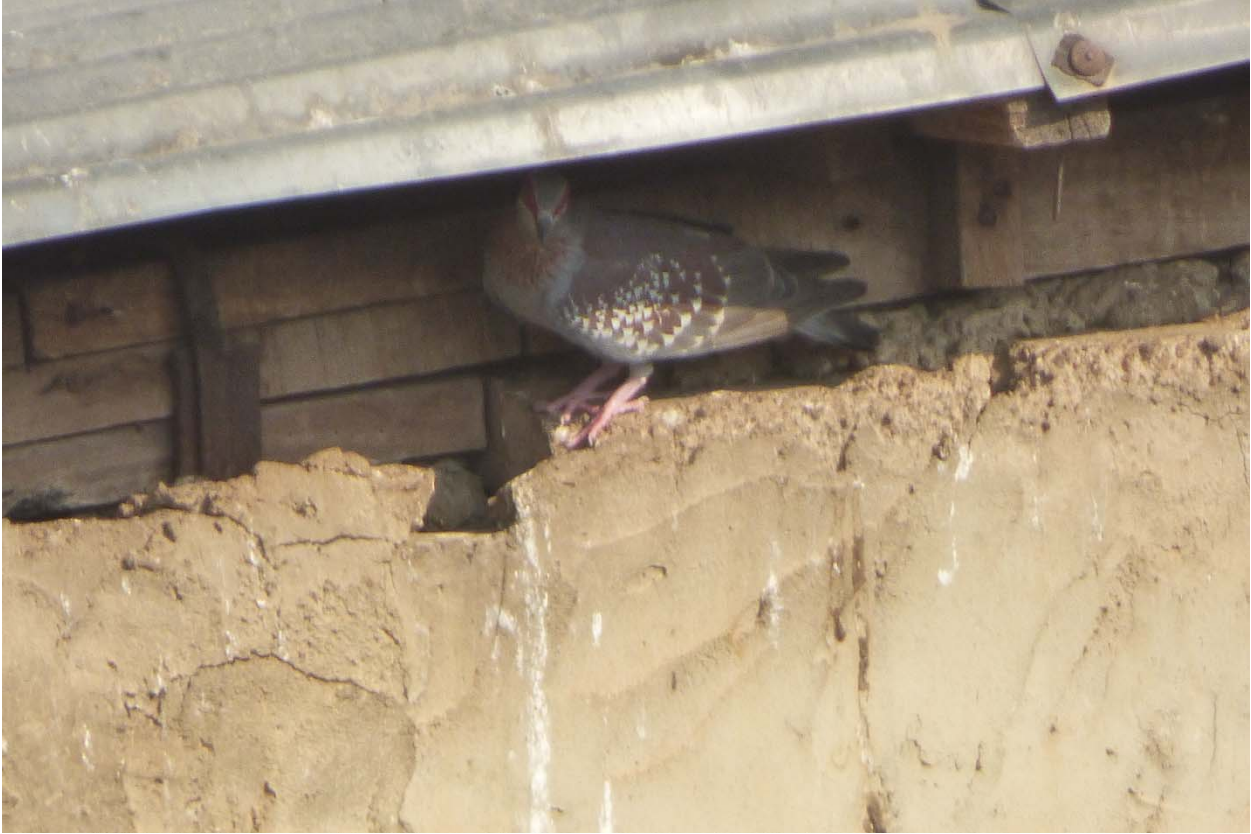

275

276 Figure 9: Speckled Pigeon (*Columba guinea*) in its roost

277

## DISCUSSION

278 The objective of this study was to examine the impacts of urbanization on bird species richness,  
279 abundance and the influence of habitat parameters on species richness and abundance in five  
280 selected urban local governments within Ibadan Metropolis. The researchers assessed the  
281 presence of birds using QGIS software application, of a uniform grid of 500 by 500 metres  
282 installed in some strategic areas in those local governments.

283 A total number of fifty-six (56) different species of birds were observed at the end of the  
284 assessment and those species were classified into Thirty (30) different family. Speckled Pigeon  
285 (*Columba guinea*) and Pied Crow (*Corvus albus*) had the highest number of individuals sighted,  
286 which were mostly found the roost around buildings' roof. The high numbers of *C.albus* might  
287 be as a result of the availability of refuse dumps littering the local governments visited. *C.albus*  
288 can be categorized as urban exploiters. These species have adapted to exploiting urban areas as  
289 seen in their close association with human habitation and dependence on human food subsidies  
290 (Labiran and Iwajomo 2018). All bird species were recorded within the surveyed grids. Few  
291 individuals of the endangered Grey Parrot *Psittacus erithacus* (BirdLife International 2019) were  
292 recorded during this survey. All other species recorded are currently categorized as Least  
293 Concerned under the IUCN Red List (IUCN 2018).

294 The Kruskal- Wallis H Test on the bird species richness revealed that the mean of Ibadan North  
295 Local Government has the highest and was rank first, subsequently followed by Ibadan South  
296 West, Ibadan South East, Ibadan North West and Ibadan North East Local Government  
297 respectively. The Post Hoc Test also reveal that there were no statistically significant differences  
298 in bird species richness in any of the Local Governments. This implies bird species richness does  
299 not vary in size of availability from one local government to another. Our study revealed that  
300 there were no difference in species richness which might probably due to the fact that all the  
301 selected local governments are urban centers and virtually the same ways of life are being  
302 practiced as they are all found in the same metropolis.

303 The Kruskal- Wahills H Test on bird species Abundance within the Local Government revealed  
304 that the mean of Ibadan North East has the highest mean rank, followed by Ibadan North, Ibadan  
305 South West, Ibadan South East and Ibadan North West Local Governments respectively. The test

306 of statistics showed that there was no statistically significant difference in bird species  
307 abundance between the local governments as a whole. The post Hoc Test showed there were no  
308 statistical significant difference between each unit of the local government. This implies bird  
309 species abundance does not varies or different in size of availability from one local government  
310 to another.

311 The Test of Between-subjects Effects was carried out to assess the influence of habitat variables  
312 on bird species richness and bird species abundance within the metropolis. There was no  
313 statistical significant effects/interaction between all the habitat variables and species richness.  
314 This implies that habitat variables do not influence bird species richness in Ibadan Metropolis.  
315 Our observed results were different compared to Iwajomo et al. (2018), where bird species  
316 richness was significantly related to the percentage of ground cover and densities of shrubs and  
317 buildings in the study area.

318 Furthermore, the number of Paved roads and number of Vehicles exacted a significant effect on  
319 bird species abundance while others variables under consideration did not exact statistically  
320 significant effects on bird species abundance. Generally, bird abundance has been reported to  
321 increase in response to increase in urbanization (Tietze and Arise 2018) and this increase has  
322 been attributed to the availability of food subsidies and the reduction of predation pressure (Luck  
323 and Smallbone 2010).

324 Thus, this study serves as a baseline to foster future research in how bird diversity is affected by  
325 urban ecosystem in Nigeria. Since urban landscapes represent a mosaic of habitats providing  
326 diverse opportunities for birds, planning efforts should seek to create and maintain an appropriate  
327 balance of habitats that provide the most opportunities for the most species. Also, for successful  
328 urban bird conservation, there is need to address the conservation needs of birds, habitat potential  
329 of various urban landscape forms, and the needs and motivations of urban residents (Labiran and  
330 Iwajomo 2018).



331

## ACKNOWLEDGEMENT

332 I give all the glory, honor and adoration to the Almighty God who has proved His greatness and  
333 support to me beyond measures during and after this research work.

334 My sincere appreciation goes Prof. I. A. Ayodele for his fatherly advice and concern throughout  
335 the period of this research. Profound gratitude also goes to Dr. A. T. Adeyanju for his love,  
336 relentless effort and contributions towards the successful completion of this project.

337 My heartfelt gratitude also goes to my ever loving and supportive parents, Mr and Mrs  
338 Adegbola, for their spiritual, moral and financial contributions. I cannot forget my paternal aunt  
339 and her husband, Surveyor and Mrs Morawo for their immense support and love. Special regards  
340 also goes to Rev. Prof. R.S Babatunde and his family, whom have been a source of support and  
341 motivation for me, thanks for the prayers and contributions.

342 I cannot but give due praises and appreciation to my sisters Abike Oluwadamilola Adegbola, and  
343 Oluwamayowa Susan Adegbola, for their numerous contributions at several occasions  
344 throughout my stay in the University, may the good Lord bless you more and more. I give  
345 special thanks to my cousin and her husband- Engr Bolaji and Mrs Adeola Sadik for their  
346 numerous contributions. Oyebamiji Ayokuleyin Uthman, thank you for assisting me to make this  
347 work a successful one, I am forever indebted to you. I also acknowledge Azeez Grace  
348 Jesuferanmi for her contributions to this research work even at her inconvenience.

349 To my course mates, the FANTABULOUS CLASS OF 40, you all are the best, I wish us all  
350 greater heights and achievements in our future endeavors. The journey would not have been fun-  
351 filled and interesting without you all. Thank you for all the good and ugly times we shared, your  
352 respect and support really means a lot. I have learnt a lot and I am very grateful. You all will  
353 always be remembered.

354 I also appreciate the following people: Mrs Temidayo Adeyanju, Mr Michael (Love Doctor) and  
355 Ibrahim Abdullahi and everybody who have been instrumental in making this project a success.

356

357 Thank you all and God bless you.

358  
359  
360  
361  
362  
363  
364  
365  
366  
367  
368  
369  
370  
371  
372  
373  
374  
375  
376  
377

## REFERENCES

Areola A, Ikporukpo C. 2018. Social Ecology and Urban Green Spaces in Ibadan, Nigeria. *Journal of Applied Sciences and Environmental Management* 22:

Blair RB. 2001. Birds and butterflies along urban gradients in two ecoregions of the U.S. In Lockwood JL, McKinney ML, Eds. *Biotic Homogenization. Norwell (MA): Kluwer*; 33–56.

Birdlife International. (2019). Birdlife Data Zone. Retrieved December 23, 2019, from Partnership for nature and people website: <http://www.birdlife.org/>

Gatesire T, Nyiramana DA, Seburanga JL, Mirville MO. 2015. Bird Diversity and Distribution in relation to Urban Landscape Types in Northern Rwanda. Available at <http://www.hindawi.com/journals/tswj/2014/157824/> [Accessed on 20 December 2019]

Hostetler M. 1997. Scale, birds and human decisions: A potential for integrative research in urban ecosystems. *Landscape and Urban Planning* 45: 15–19.

Iwajomo S. 2018. Patterns in Bird Species Richness and Abundance in the University of Lagos, Akoka Campus. *Journal of Research in Forestry, Wildlife and Environmental*; 10

Labiran J, Iwajomo S. 2018. Factors Influencing Bird Species Richness and Abundance in Surulere Local Government Area of Lagos State, Nigeria. *Proceedings of 6th NSCB Biodiversity Conference: Uniuoyo*: pp 183 - 188.

Lin YP, Chang CR, Chu HJ, Cheng BY. 2011. Identifying the spatial mixture distribution of bird diversity across urban and suburban areas in the metropolis: A case study in Taipei Basin of Taiwan. *Landscape and Urban Planning* 102: 156–163.

- 378 Luck GW, Smallbone L. 2010. Species diversity and urbanization: patterns, drivers and  
379 implications. *Cambridge University Press* 39: 256-289.
- 380 Magle SB, Hunt VM, Vernon M, Crooks KR. 2012. Urban wildlife research: Past, present and  
381 future. *Biological Conservation* 155: 22–32.
- 382 McCaffrey RE, Mannan RW. 2012. How scale influences birds' responses to habitat features in  
383 urban residential areas. *Landscape and Urban Planning* 105: 274–280.
- 384 McKinney ML. 2002. Urbanization, biodiversity and conservation. *Bioscience* 52: 883–890.
- 385 Popoola A, Wahab B. 2018. Climate-induced problems and adaptation strategies of urban  
386 farmers in Ibadan. *Ethiopian Journal of Environmental Studies & Management* 11: 31–42.
- 387 Salami RO, Von Meding JK, H Giggins. 2016. Assessing habitats of vulnerability in African  
388 Cities: A case of poverty outing in Ibadan Metropolis, Nigeria.
- 389 Sol D, Gonza lez-Lagos C, Moreira D, Maspons J, L, O. 2014. Urbanisation tolerance and the  
390 loss of avian diversity. *Ecology Letters* 17: 942–950.
- 391 Tietze DT (eds), Arise HT. 2018. *Bird Species: How they arise, modify and vanish*. Switzerland:  
392 Springer.
- 393 Walker JS, Balling RC, Briggs JM, Katti M, Warren PS, Wentz EA. 2008. Birds of a feather:  
394 Interpolating distribution patterns of urban birds. *Computers, Environment and Urban*  
395 *Systems* 32: 19–28.
- 396 Wolff PJ, Degregorio BA, Rodriguez-Cruz V, Mulero-Oliveras E, Sperry JH. 2018. Bird  
397 community assemblage and distribution in a tropical, urban ecosystem of Puerto Rico.

398        *Tropical Conservation Science* 11.

399

400

## TABLE OF CONTENTS

| 401 | <b>Contents</b>       | <b>Pages</b> |
|-----|-----------------------|--------------|
| 402 | Abstract              | 1            |
| 403 | Keywords              | 1            |
| 404 | Introduction          | 2            |
| 405 | Materials and Methods | 4            |
| 406 | Results               | 10           |
| 407 | Discussion            | 30           |
| 408 | Acknowledgement       | 32           |
| 409 | References            | 33           |
| 410 | Tables                | 36           |
| 411 | Appendix              | 38           |
| 412 | Figure Legends        | 41           |

413

## LIST OF TABLES

| 414 | <b>Table</b> | <b>Title</b>                                                                 | <b>Pages</b> |
|-----|--------------|------------------------------------------------------------------------------|--------------|
| 415 | 1a           | Descriptive Statistics on Species Richness                                   | 11           |
| 416 | 1b           | Kruskal- Wallis H Test on Species Richness                                   | 12           |
| 417 | 1c           | Post Hoc Test on Bird Species Richness                                       | 13           |
| 418 | 2a           | Descriptive Statistics on Species Abundance                                  | 16           |
| 419 | 2b           | Kruskal- Wallis H Test on Bird Species Abundance                             | 17           |
| 420 | 2c           | Post Hoc Test on Species Abundance                                           | 18           |
| 421 | 3            | Test of between- Subjects Effects on Species Richness and habitat variables  | 21           |
| 422 | 4            | Test of between- Subjects Effects on Species Abundance and Habitat variables | 23           |

423

## Appendix

### 424 SPECIES OF BIRDS OBSERVED AND THEIR GROUPING

|     | <b>Family</b>       | <b>Scientific Name</b>           | <b>Species</b>           |
|-----|---------------------|----------------------------------|--------------------------|
| 425 |                     |                                  |                          |
| 426 | <b>Apodidae</b>     | <i>Apus affinis</i>              | Little Swift             |
| 427 | <b>Apodidae</b>     | <i>Cypsiurus parvus</i>          | African Palm Swift       |
| 428 | <b>Apodidae</b>     | <i>Telacanthura ussheri</i>      | Mottled Spinetail        |
| 429 | <b>Accipitridae</b> | <i>Milvus migrans</i>            | Yellow Billed Kite       |
| 430 | <b>Alcedinidae</b>  | <i>Ceyx pictus</i>               | African Pygmy Kingfisher |
| 431 | <b>Alcedinidae</b>  | <i>Alcedo cristata</i>           | Malachite Kingfisher     |
| 432 | <b>Alcedinidae</b>  | <i>Halcyon senegalensis</i>      | Woodland Kingfisher      |
| 433 | <b>Alcedinidae</b>  | <i>Halcyon malimbica</i>         | Blue-breasted Kingfisher |
| 434 | <b>Ardeidae</b>     | <i>Bubulcus Ibis</i>             | Western Cattle Egret     |
| 435 | <b>Ardeidae</b>     | <i>Ardea purpurea</i>            | Grey Heron               |
| 436 | <b>Bucerotidae</b>  | <i>Tockus fasciatus</i>          | African Pied Hornbill    |
| 437 | <b>Bucerotidae</b>  | <i>Tockus nasutus</i>            | African Grey Hornbill    |
| 438 | <b>Cisticolidae</b> | <i>Cisticola erythrops</i>       | Red-faced Cisticola      |
| 439 | <b>Columbidae</b>   | <i>Streptopelia senegalensis</i> | Laughing dove            |
| 440 | <b>Columbidae</b>   | <i>Streptopelia semitorquata</i> | Red-eyed Dove            |
| 441 | <b>Columbidae</b>   | <i>Tutur afer</i>                | Blue-spotted Wood Dove   |
| 442 | <b>Columbidae</b>   | <i>Columba guinea</i>            | Speckled Pigeon          |
| 443 | <b>Coraciidae</b>   | <i>Eurystomus glaucurus</i>      | Broad-billed Roller      |

|     |                     |                               |                         |
|-----|---------------------|-------------------------------|-------------------------|
| 444 | <b>Corvidae</b>     | <i>Corvus albus</i>           | Pied Crow               |
| 445 | <b>Corvidae</b>     | <i>Ptilostomus afer</i>       | Piacpiac                |
| 446 | <b>Cuculidae</b>    | <i>Centropus senegalensis</i> | Senegal Coucal          |
| 447 | <b>Cuculidae</b>    | <i>Centropus monachus</i>     | Blue-headed Coucal      |
| 448 | <b>Charadriidae</b> | <i>Vanellus spinosus</i>      | Spur-winged Lapwing     |
| 449 | <b>Dicruridae</b>   | <i>Dicrurus adsimilis</i>     | Forked-tailed Drongo    |
| 450 | <b>Estrildidae</b>  | <i>Estrilda melpada</i>       | Orange-cheeked Waxbill  |
| 451 | <b>Estrildidae</b>  | <i>Logonosticta rufopicta</i> | Bar-breasted Fire Finch |
| 452 | <b>Estrildidae</b>  | <i>Spermestes cucullatus</i>  | Bronze Mannikin         |
| 453 | <b>Falconidae</b>   | <i>Falco tinnuculus</i>       | Common Kestrel          |
| 454 | <b>Falconidae</b>   | <i>Falco ardosiaceus</i>      | Grey Kestrel            |
| 455 | <b>Hirundinidae</b> | <i>Hirundo aethiopica</i>     | Ethiopian Swallow       |
| 456 | <b>Hirundinidae</b> | <i>Hirundo senegalensis</i>   | Mosque Swallow          |
| 457 | <b>Hirundinidae</b> | <i>Hirundo rustica</i>        | Barn Swallow            |
| 458 | <b>Hirundinidae</b> | <i>Hirundo fuligula</i>       | Rock Martin             |
| 459 | <b>Laniidae</b>     | <i>Corvinella corvina</i>     | Yellow-billed Shrike    |
| 460 | <b>Meropidae</b>    | <i>Merops bullockoides</i>    | White-fronted Bee Eater |
| 461 | <b>Meropidae</b>    | <i>Merops persicus</i>        | Blue-cheeked Bee-Eater  |
| 462 | <b>Musophagidae</b> | <i>Crinifer piscator</i>      | Western Plantain Eater  |
| 463 | <b>Motacillidae</b> | <i>Motacilla aguimp</i>       | African Pied Wagtail    |
| 464 | <b>Motacillidae</b> | <i>Anthus leucophrys</i>      | Plain-backed Pipit      |



|     |                       |                                 |                                 |
|-----|-----------------------|---------------------------------|---------------------------------|
| 465 | <b>Nectariniidae</b>  | <i>Cinnyris chloropygius</i>    | Olive Bellied Sunbird           |
| 466 | <b>Nectariniidae</b>  | <i>Cinnyris coccinigastrus</i>  | Splendid Sunbird                |
| 467 | <b>Nectariniidae</b>  | <i>Cinnyris Superbus</i>        | Superb Sunbird                  |
| 468 | <b>Nectariniidae</b>  | <i>Hedydipna collaris</i>       | Collared Sunbird                |
| 469 | <b>Nectariniidae</b>  | <i>Cyanomitra olivacea</i>      | Olive Sunbird                   |
| 470 | <b>Phasianiidae</b>   | <i>Francolinus bicalcaratus</i> | Double-spurred Francolin        |
| 471 | <b>Phoeniculidae</b>  | <i>Malimbus rubricollis</i>     | Red-headed Malimbe              |
| 472 | <b>Passridae</b>      | <i>Passer griseus</i>           | Northern Grey-headed Sparrow    |
| 473 | <b>Phoeniculidae</b>  | <i>Phoeniculus purpureus</i>    | Green Wood-hoopoe               |
| 474 | <b>Platysteiridae</b> | <i>Platysteira cyanea</i>       | Common Wattle-eye               |
| 475 | <b>Ploceidae</b>      | <i>Ploceus cucullatus</i>       | Village Weaver                  |
| 476 | <b>Pycnonotidae</b>   | <i>Pycnonotus barbatus</i>      | Common Bulbul                   |
| 477 | <b>Psittacidae</b>    | <i>Poicephalus senegalus</i>    | Senegal Parrot                  |
| 478 | <b>Sturnidae</b>      | <i>Lamprotornis purpure us</i>  | Purple Glossy Starling          |
| 479 | <b>Sturnidae</b>      | <i>Onychognathus fulgidus</i>   | Forest Chestnut-winged Starling |
| 480 | <b>Sylviidae</b>      | <i>Camaroptera brachyuran</i>   | Grey-backed Camaroptera         |
| 481 | <b>Sylviidae</b>      | <i>Prinia subflava</i>          | Tawny-flanked Prinia            |
| 482 | <b>Turtidae</b>       | <i>Turdus pelios</i>            | African Thrush                  |

---

483

| 484 | <b>FIGURE LEGENDS</b> |                                                                                  |              |
|-----|-----------------------|----------------------------------------------------------------------------------|--------------|
| 485 | <b>Figure</b>         | <b>Title</b>                                                                     | <b>Pages</b> |
| 486 | 1                     | Map of Ibadan metropolis                                                         | 5            |
| 487 | 2                     | Map of Ibadan Metropolis, Oyo State showing communities                          | 6            |
| 488 | 3                     | Map showing survey grids                                                         | 8            |
| 489 | 4                     | Common Kestrel ( <i>Falco tinnunculus</i> ) resting on a billboard               | 24           |
| 490 | 5                     | Yellow Billed Kite ( <i>Milvus aegyptius</i> ) brooding in a nest on a billboard | 25           |
| 491 | 6                     | Pied Crow ( <i>Corvus albus</i> ) hovering in the sky                            | 26           |
| 492 | 7                     | Yellow Billed Kite ( <i>Milvus aegyptius</i> ) hovering in the sky               | 27           |
| 493 | 8                     | Speckled Pigeon ( <i>Columba guinea</i> ) in its roost                           | 28           |
| 494 | 9                     | Laughing Dove ( <i>Streptopelia semitorquata</i> ) resting on a roof             | 29           |
